# Supplementary material for: 1,1′-Bis(di-tert-butylphosphino)ferrocene copper(i) complex catalyzed C–H activation and carboxylation of terminal alkynes
Source: Royal Society of Chemistry journal article supplement (doi:10.1039/c5dt03794h), 2015-01-01

# **1,1'-bis(di-*tert*-butylphosphino) ferrocene copper(I) complex catalyzed C-H activation and carboxylation of terminal alkynes**

**Manoj Trivedi,<sup>\*a</sup> Gurmeet Singh,<sup>a\*</sup> Abhinav Kumar,<sup>b</sup> Nigam P. Rath<sup>\*c</sup>**

<sup>[a]</sup>\*Department of Chemistry, University of Delhi, Delhi-110007, India

<sup>[b]</sup>Department of Chemistry, Faculty of Science, University of Lucknow,

Lucknow-226 007, India

<sup>[c]</sup>\*Department of Chemistry & Biochemistry and Centre for Nanoscience, University of

Missouri-St. Louis, One University Boulevard, St. Louis, MO 63121-4499, USA

E-mail address: manojtri@gmail.com (M.T.), gurmeet123@yahoo.com (G.S.);

rathn@umsl.edu(NPR).

Corresponding author. Tel.: + 91 9811730475 (MT); (314) 516-5333 (NPR).

# **Supporting Information**

**Table 1:** Crystallographic data for **2**, and **4**.

|                                        | <b>2</b>                                            | <b>4</b>                                                                                                     |
|----------------------------------------|-----------------------------------------------------|--------------------------------------------------------------------------------------------------------------|
| Empirical Formula                      | C <sub>26</sub> H <sub>44</sub> CuFeIP <sub>2</sub> | C <sub>56</sub> H <sub>94</sub> Cu <sub>6</sub> Fe <sub>2</sub> I <sub>6</sub> N <sub>2</sub> P <sub>4</sub> |
| FW                                     | 664.84                                              | 2173.55                                                                                                      |
| crystal system                         | Orthorhombic                                        | Triclinic                                                                                                    |
| space group                            | P n a 2 <sub>1</sub>                                | P $\bar{1}$                                                                                                  |
| a, Å                                   | 16.6781(8)                                          | 11.0201(6)                                                                                                   |
| b, Å                                   | 8.5263(4)                                           | 11.8953(7)                                                                                                   |
| c, Å                                   | 19.8071(9)                                          | 14.7688(9)                                                                                                   |
| $\alpha$ , deg                         | 90.00                                               | 107.370(3)                                                                                                   |
| $\beta$ , deg                          | 90.00                                               | 93.230(3)                                                                                                    |
| $\gamma$ , deg                         | 90.00                                               | 105.503(3)                                                                                                   |
| V, Å <sup>3</sup>                      | 2816.6(2)                                           | 1760.87(18)                                                                                                  |
| Z                                      | 4                                                   | 1                                                                                                            |
| d <sub>calc</sub> , g cm <sup>-3</sup> | 1.568                                               | 2.050                                                                                                        |
| $\mu$ , mm <sup>-1</sup>               | 2.492                                               | 4.931                                                                                                        |
| T, K                                   | 100(2)                                              | 100(2)                                                                                                       |
| R <sub>1</sub> all                     | 0.0430                                              | 0.0495                                                                                                       |
| R <sub>1</sub> [I > 2 $\sigma$ (I)]    | 0.0293                                              | 0.0366                                                                                                       |
| wR <sub>2</sub>                        | 0.0483                                              | 0.0939                                                                                                       |
| wR <sub>2</sub> [I > 2 $\sigma$ (I)]   | 0.0452                                              | 0.0870                                                                                                       |
| GoF                                    | 0.988                                               | 1.004                                                                                                        |

**Table 3:** Weak interactions for the complexes **2** and **4** [ $\text{\AA}$  and  $^\circ$ ].

| D-H $\cdots$ A                                                                                                  | d(D-H) | d(H $\cdots$ A) | d(D $\cdots$ A) | $\angle$ (DHA) |
|-----------------------------------------------------------------------------------------------------------------|--------|-----------------|-----------------|----------------|
| <b>Complex-2</b>                                                                                                |        |                 |                 |                |
| C(7)-H(7) $\cdots$ I(1) <sup>#1</sup>                                                                           | 0.95   | 3.23            | 3.8299(17)      | 122.8          |
| C(10)-H(10) $\cdots$ I(1) <sup>#2</sup>                                                                         | 0.95   | 3.00            | 3.7770(19)      | 140.5          |
| C(13)-H(13C) $\cdots$ I(1)                                                                                      | 0.98   | 3.32            | 4.258(3)        | 160.3          |
| C(24)-H(24A) $\cdots$ I(1)                                                                                      | 0.98   | 3.18            | 4.138(2)        | 165.8          |
| Symmetry transformations used to generate equivalent atoms: <sup>#1</sup> x,y-1,z, <sup>#2</sup> x+1/2,-y+3/2,z |        |                 |                 |                |
| <b>Complex-4</b>                                                                                                |        |                 |                 |                |
| C(7)-H(7) $\cdots$ N(1S)                                                                                        | 0.95   | 2.52            | 3.373(4)        | 148.8          |
| Symmetry transformations used to generate equivalent atoms:<br><sup>#1</sup> -x+1,-y+1,-z+2                     |        |                 |                 |                |

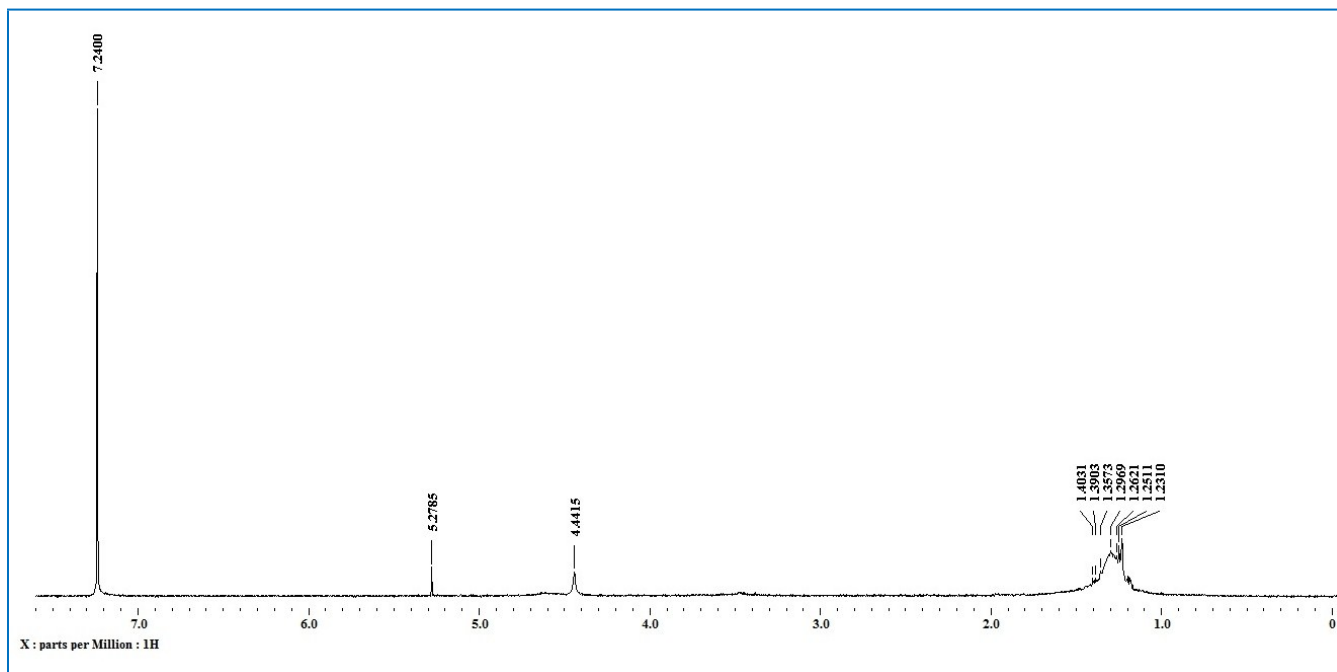

**F-1.** <sup>1</sup>H NMR spectrum of **1** in CDCl<sub>3</sub>.

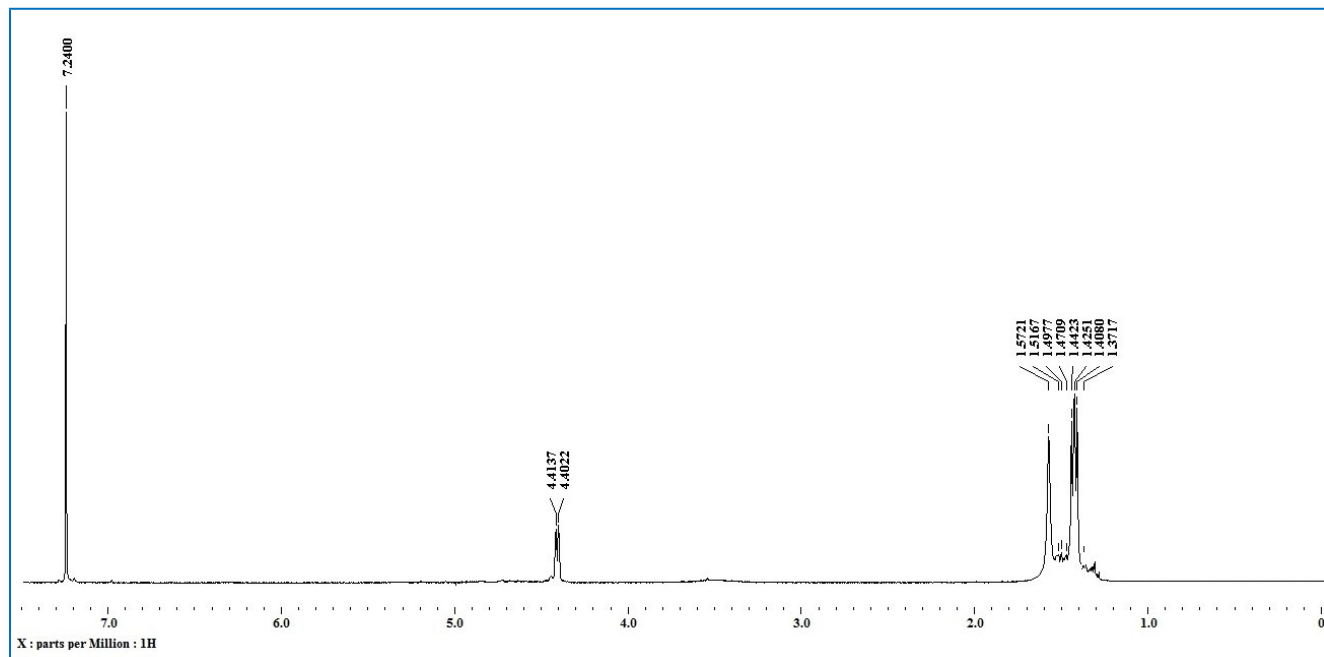

F-2. <sup>1</sup>H NMR spectrum of **2** in CDCl<sub>3</sub>.

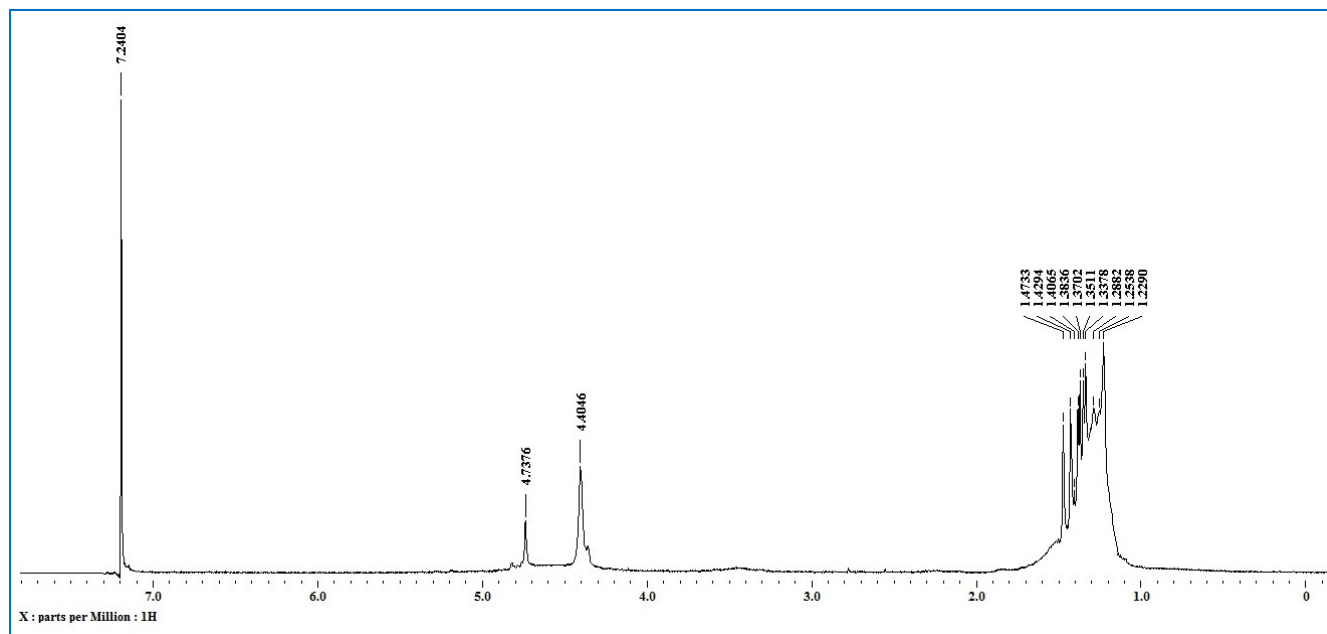

F-3. <sup>1</sup>H NMR spectrum of **4** in CDCl<sub>3</sub>.

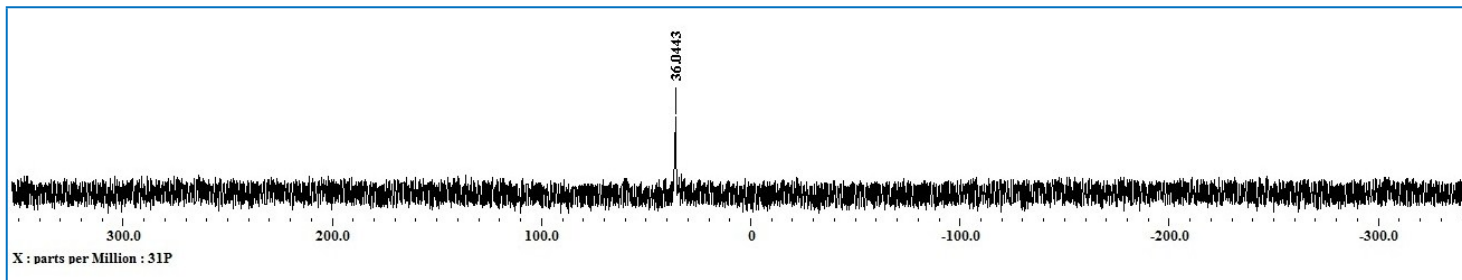

F-4.  $^{31}\text{P}$  NMR spectrum of complex **1** in  $\text{CDCl}_3$ .

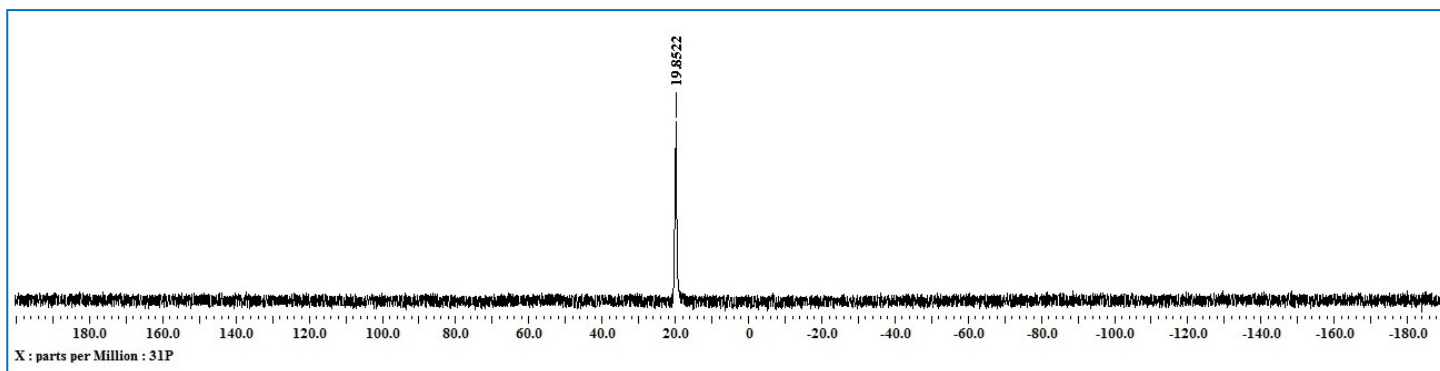

F-5.  $^{31}\text{P}$  NMR spectrum of complex **2** in  $\text{CDCl}_3$ .



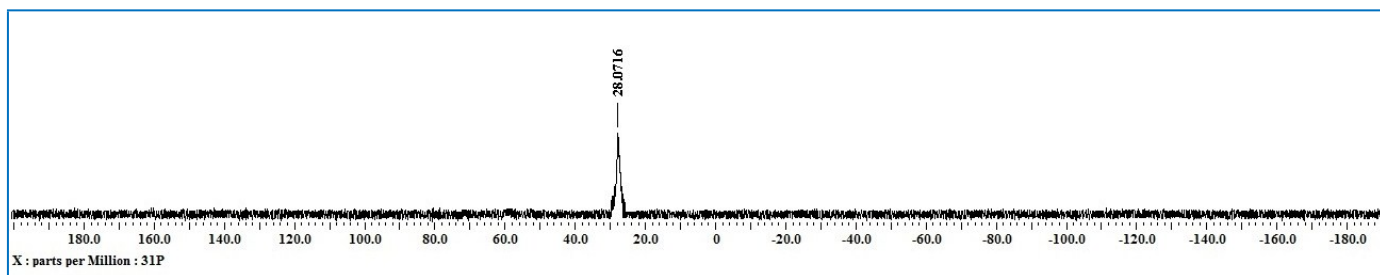

F-6.  $^{31}\text{P}$  NMR spectrum of complex **4** in  $\text{CDCl}_3$ .

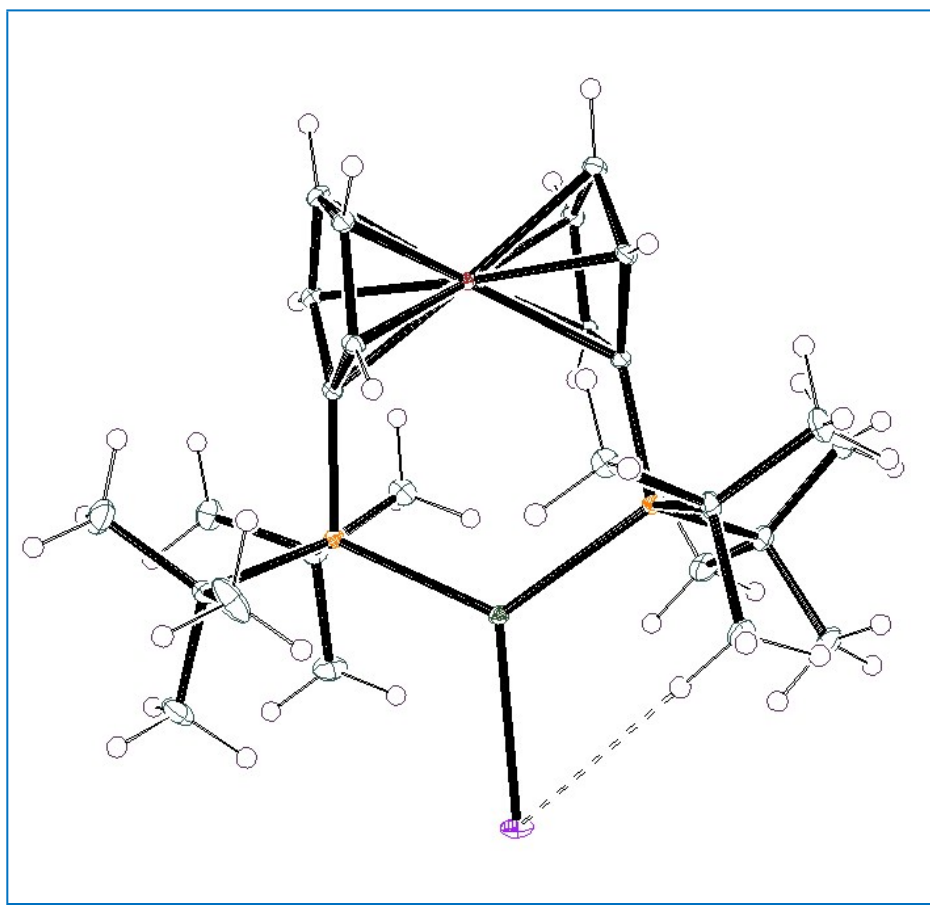

**F-7.** Ortep diagram of **2** showing C-H...I weak interactions in the crystal lattice.

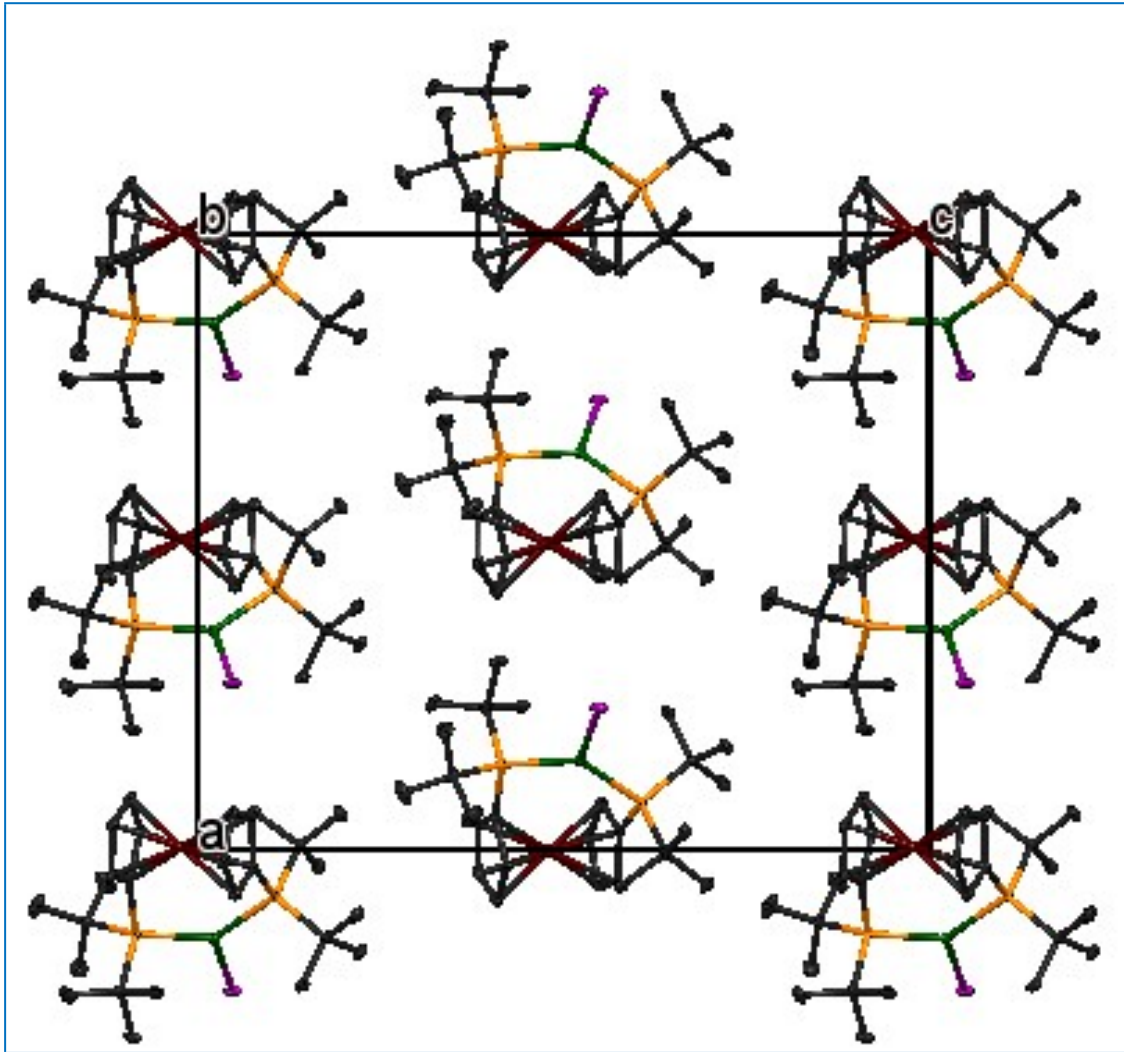

F-8. Crystal packing diagram of 2, viewed along the *b* axis.

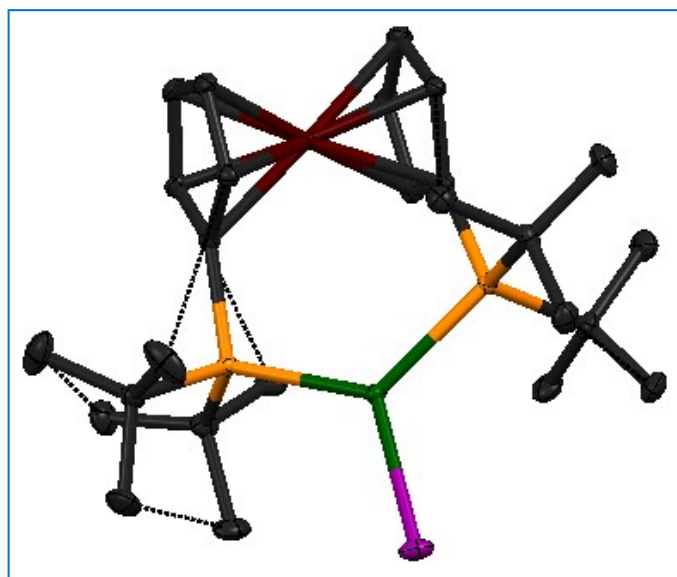

F-9.  $\pi \cdots \pi$  interactions in complex 2.

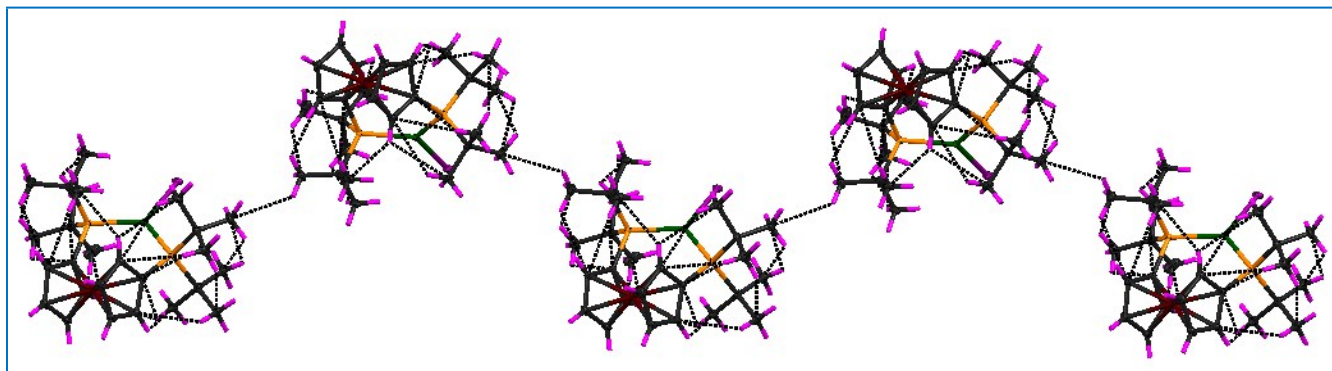

**F-10.** Single helical motif in complex **2** accompanied by C-H $\cdots$  $\pi$  interactions along crystallographic '*b*'-axis.

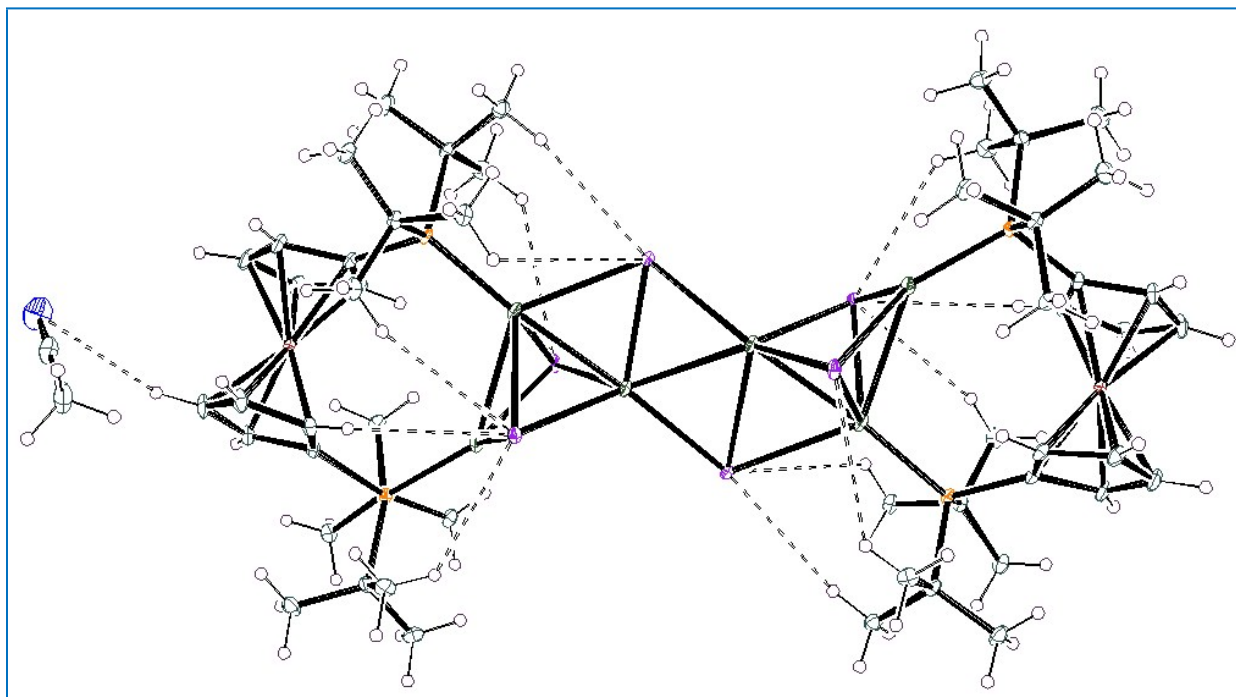

**F-11.** Ortep diagram of complex **4** showing C-H...I and C-H...N weak interactions in the crystal lattice.

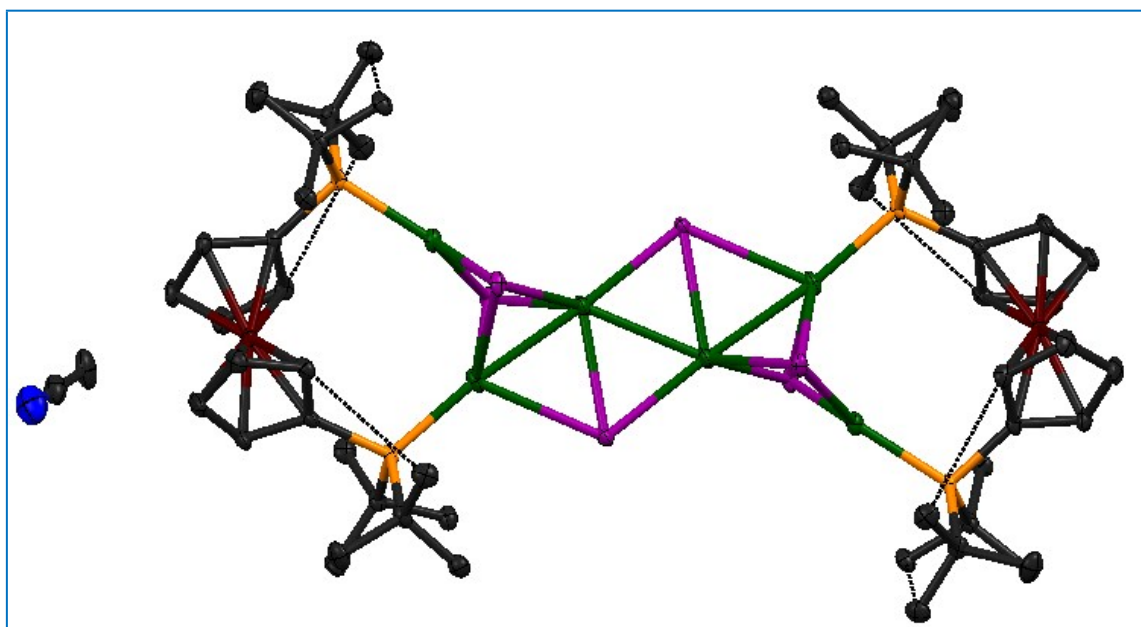

F-12.  $\pi \cdots \pi$  interactions in complex 4.

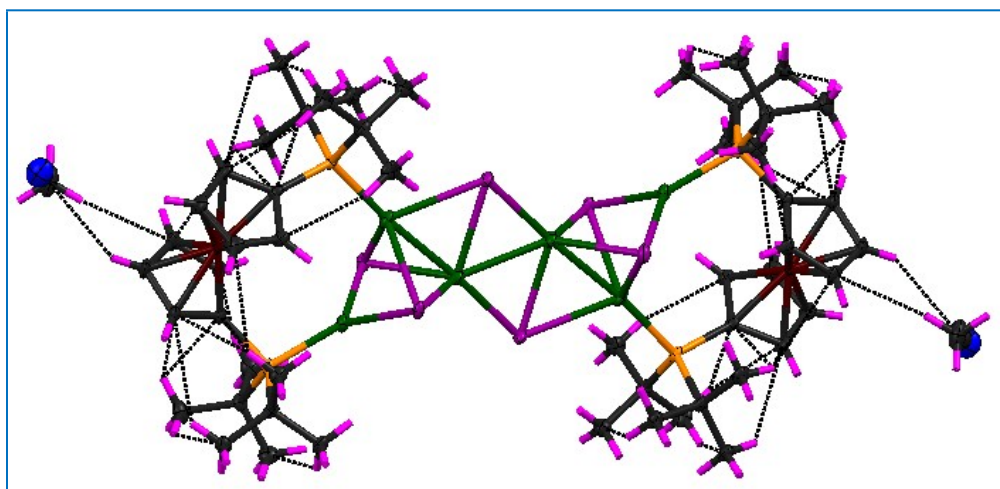

F-13. C-H... $\pi$  interactions in complex 4.



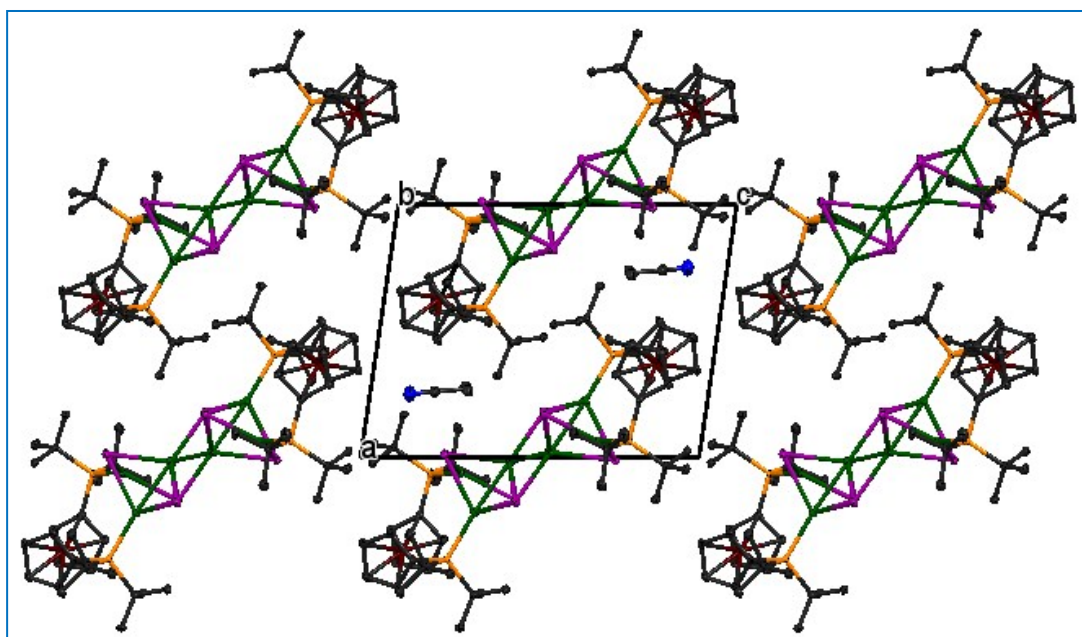

F-14. Crystal packing diagram of **4**, viewed along the *b* axis.

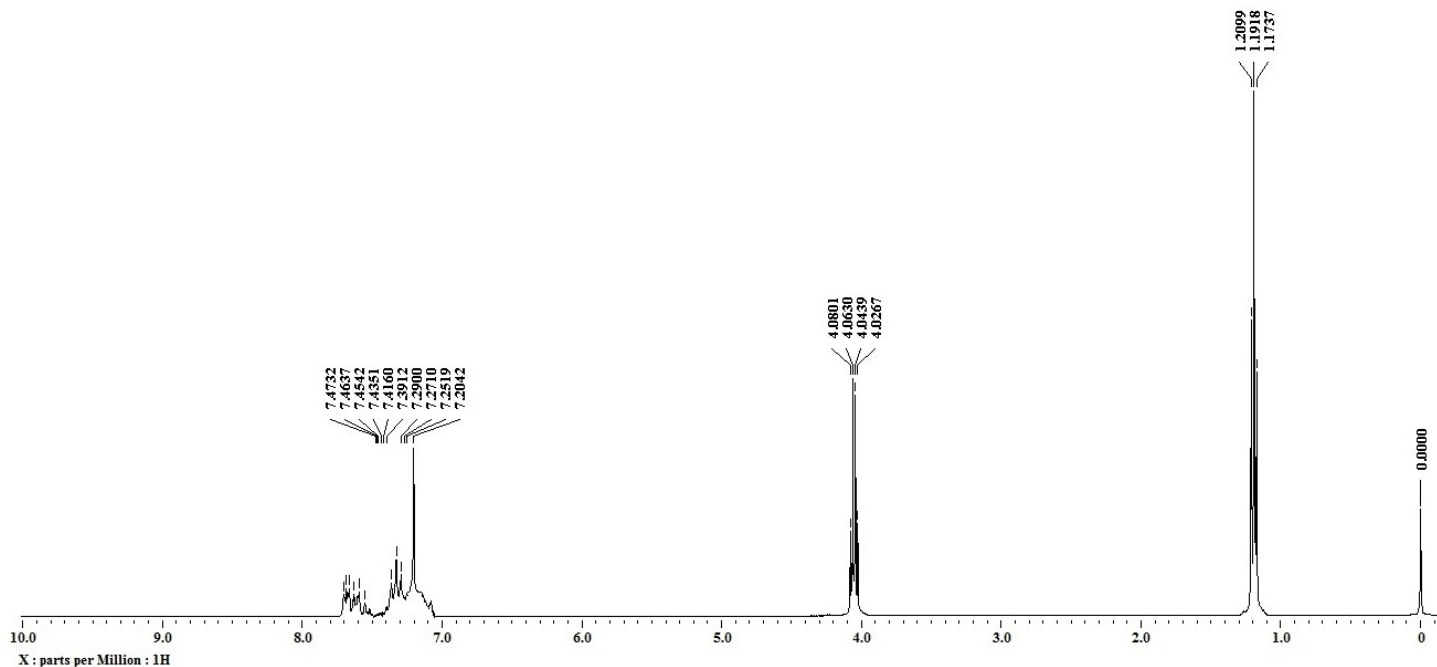

**F-15.** <sup>1</sup>H NMR spectrum of reaction mixture for the synthesis of 3-phenylpropionic acid from CO<sub>2</sub> and Phenylacetylene catalysed by complex **2** in CDCl<sub>3</sub> after 12h at room temperature.

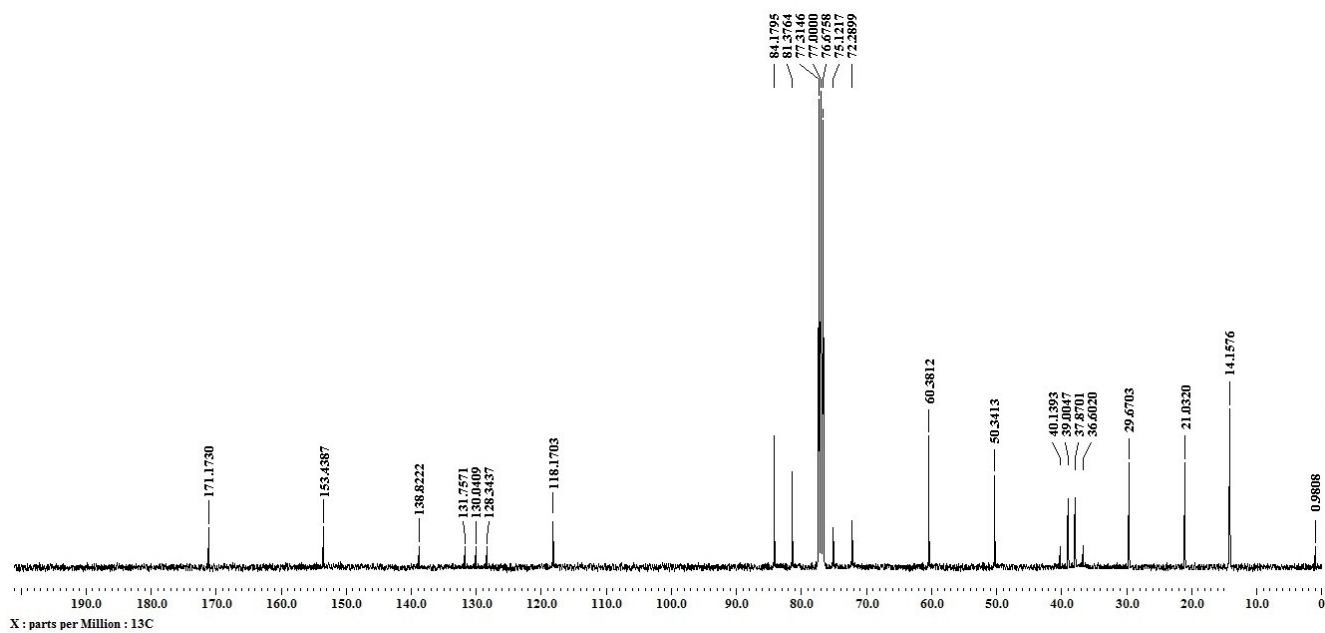

**F-16.**  $^{13}\text{C}$  NMR spectrum of reaction mixture for the synthesis of 3-phenylpropionic acid from  $\text{CO}_2$  and Phenylacetylene catalysed by complex **2** in  $\text{CDCl}_3$  after 12h at room temperature.

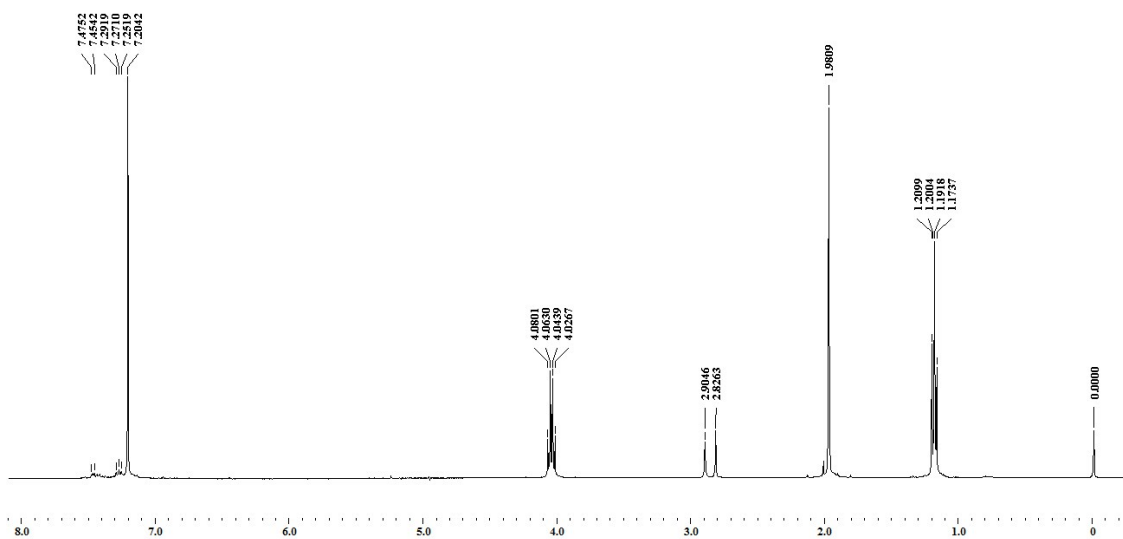

**F-17.**  $^1\text{H}$  NMR spectrum of reaction mixture for the synthesis of 3-phenylpropionic acid from  $\text{CO}_2$  and Phenylacetylene catalysed by complex **2** in  $\text{CDCl}_3$  after 24h at room temperature.

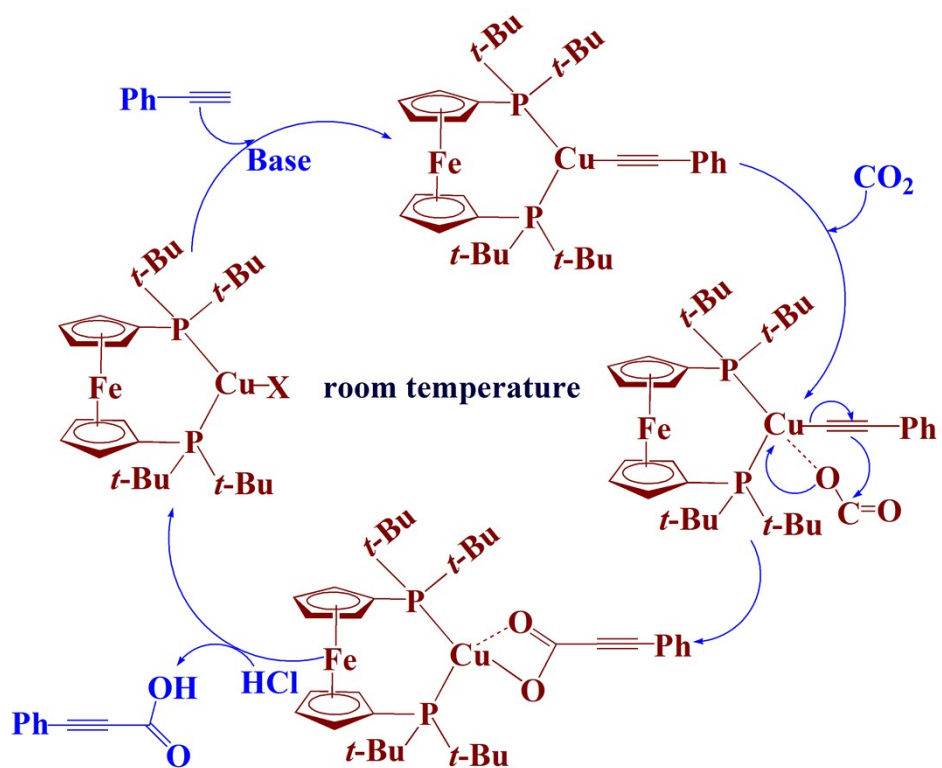

**F18.** The possible reaction mechanism for Cu(I) complex catalyzed C-H activating carboxylation of terminal alkynes with CO<sub>2</sub>.

## Characterization Data:

### 3-phenylpropionic acid:

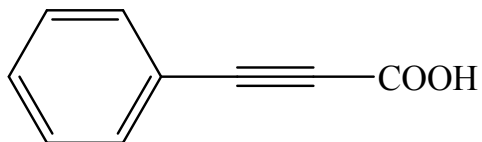

$^1\text{H}$  NMR (400 MHz,  $\text{CDCl}_3$ ):  $\delta$  = 7.60 (d,  $J$  = 7.3 Hz, 2H, Ar-H), 7.43 (t,  $J$  = 8.0 Hz, 1H, Ar-H), 7.36 (t,  $J$  = 5.1 Hz, 2H, Ar-H);  $^{13}\text{C}$  NMR (400 MHz,  $\text{CDCl}_3$ ):  $\delta$  = 153.24 (-COOH), 131.77, 130.02, 128.21, 118.26, 84.05, 81.41, 40.55, 39.77, 39.54, 39.26, 38.94, 38.70; GCMS  $m/z$ (% rel. inten.) 146 ( $\text{M}^+$ , 100).

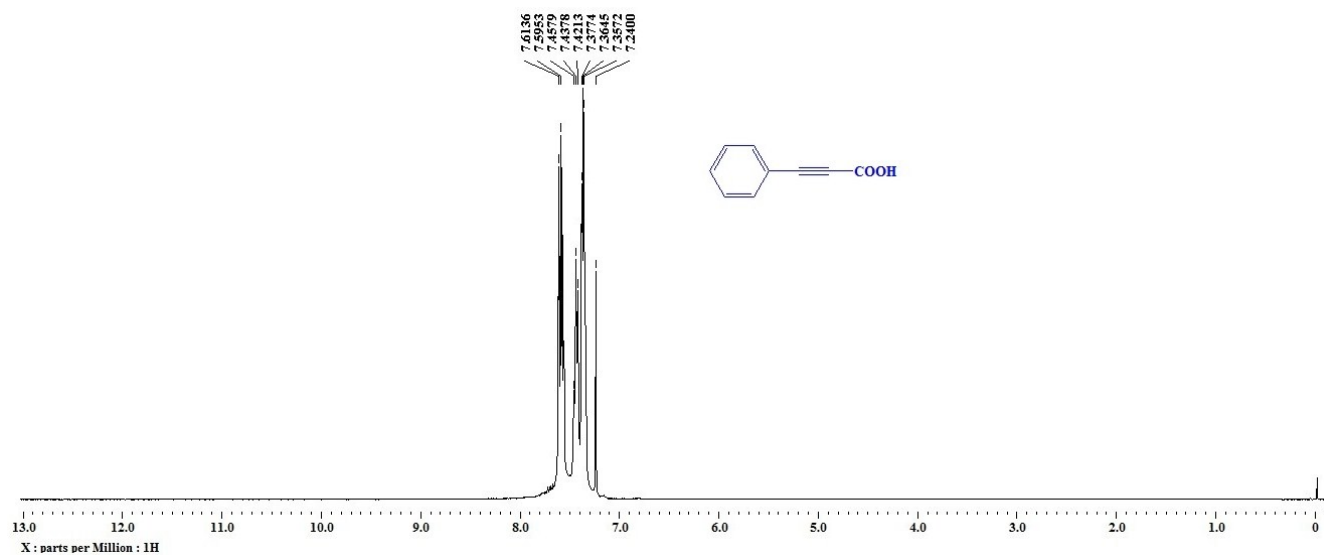

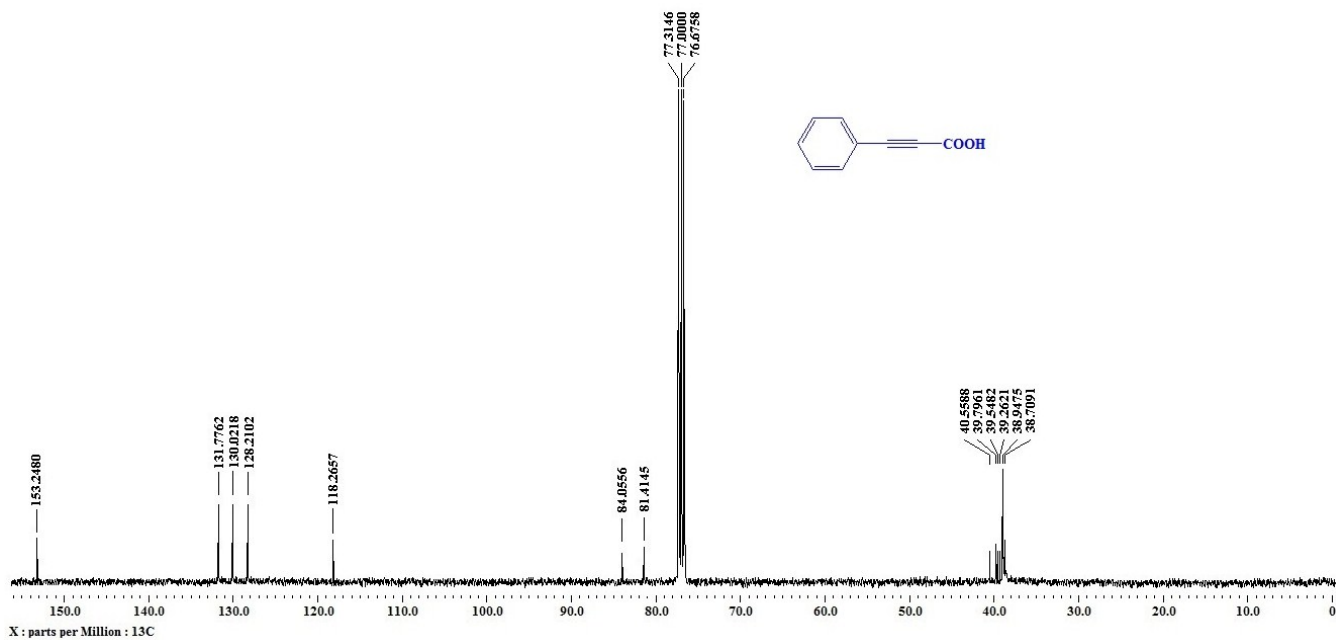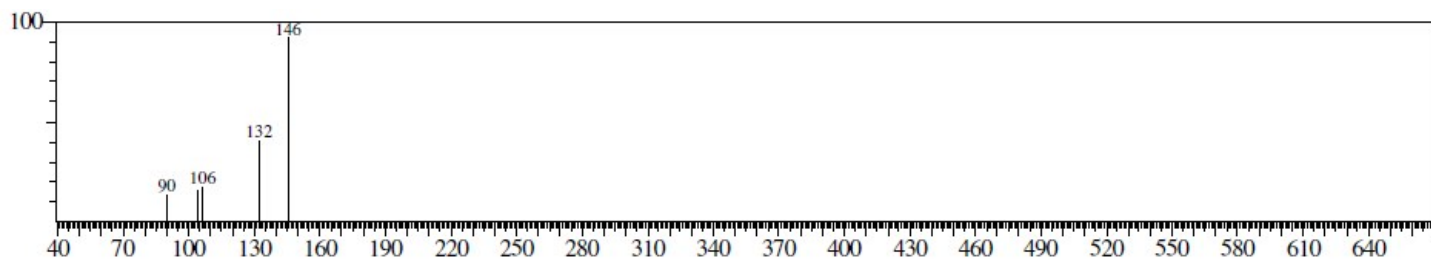

**3-(4-chlorophenyl)propionic acid:**

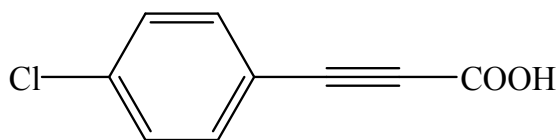

$^1\text{H}$  NMR (400 MHz,  $\text{CDCl}_3$ ):  $\delta$  = 7.64 (d,  $J$  = 10.2 Hz, 2H, Ar-H), 7.44 (d,  $J$  = 8.8 Hz, 2H, Ar-H);  $^{13}\text{C}$  NMR (400MHz,  $\text{CDCl}_3$ ):  $\delta$  = 153.20 (-COOH), 134.90, 133.38, 128.48, 117.28, 82.55, 82.32, 40.10, 40.06, 39.76, 39.53, 39.04, 38.97, 38.61; GCMS  $m/z$ (% rel. inten.) 181 ( $\text{M}^+$ , 100).

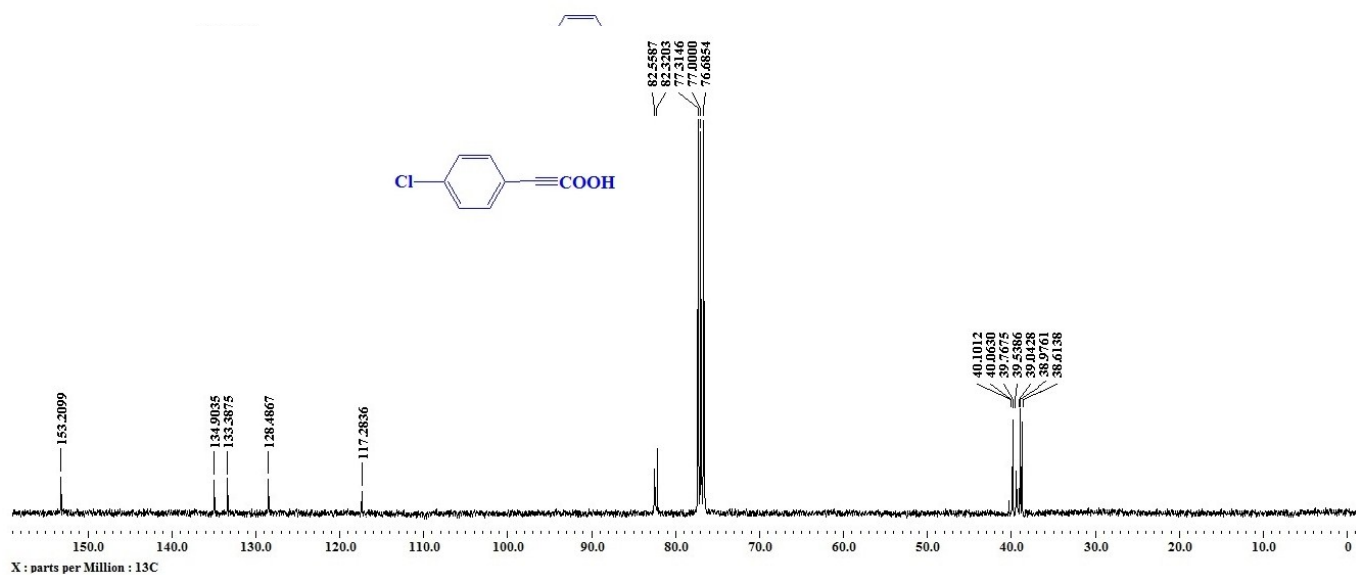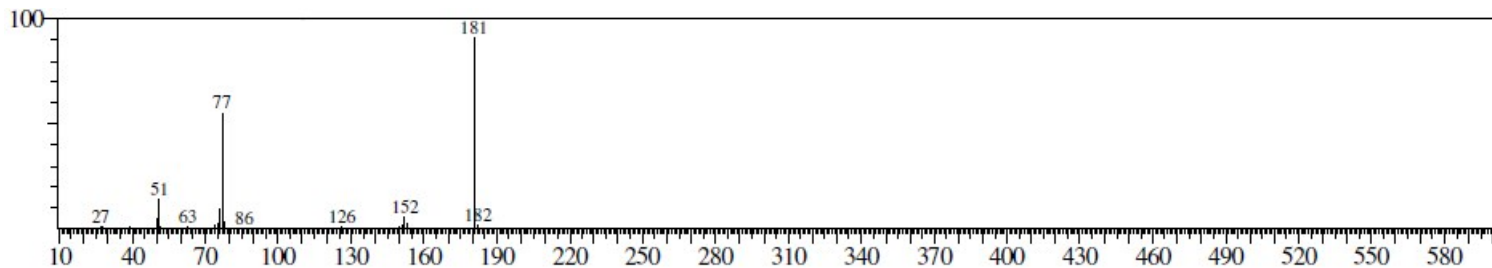

### 3-(4-methoxyphenyl)propionic acid:

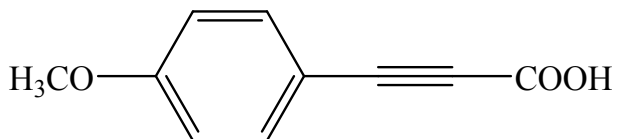



$^1\text{H}$  NMR (400 MHz,  $\text{CDCl}_3$ ):  $\delta = 7.41$  (d,  $J = 7.6$  Hz, 2H, Ar-H),  $7.34$  (d,  $J = 9.1$  Hz, 2H, Ar-H),  $3.74$  (s, 3H,  $\text{CH}_3$ );  $^{13}\text{C}$  NMR (400 MHz,  $\text{CDCl}_3$ ):  $\delta = 160.66$ (-COOH),  $153.57$ ,  $133.39$ ,  $113.75$ ,  $111.10$ ,  $84.79$ ,  $80.83$ ,  $55.40$ ,  $40.12$ ,  $40.10$ ,  $39.76$ ,  $39.58$ ,  $39.30$ ,  $38.99$ ,  $38.61$ ; GCMS  $m/z$ (% rel. inten.)  $176$  ( $\text{M}^+$ , 100).

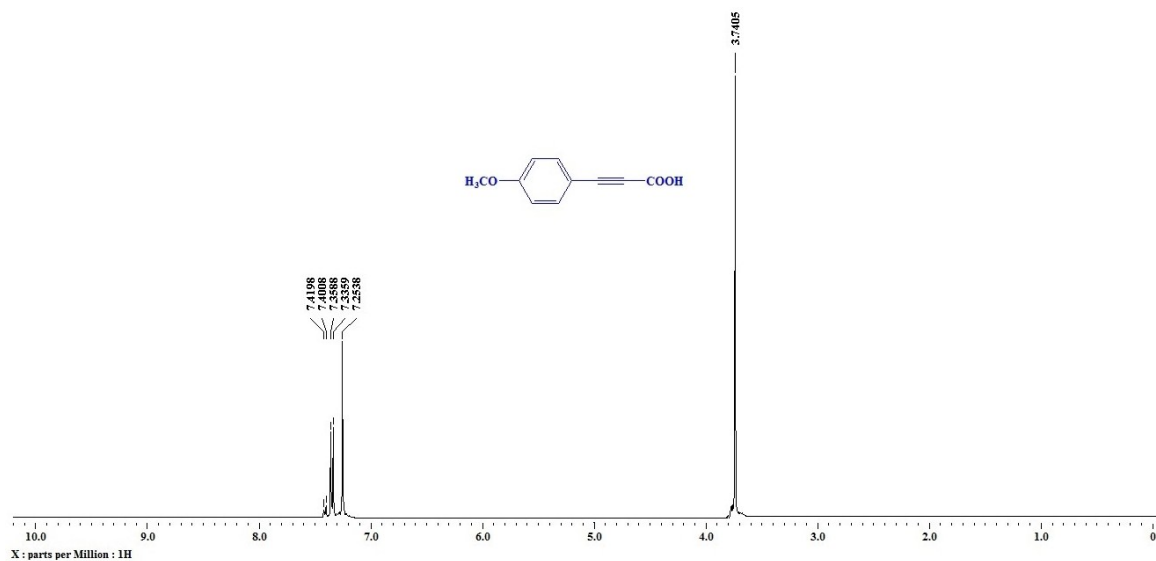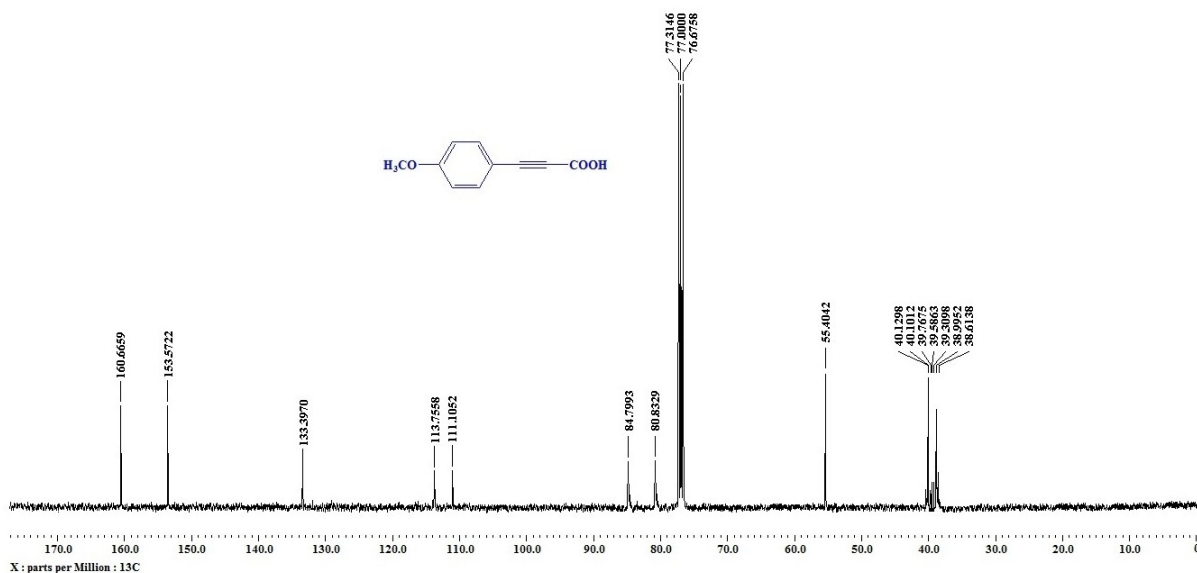

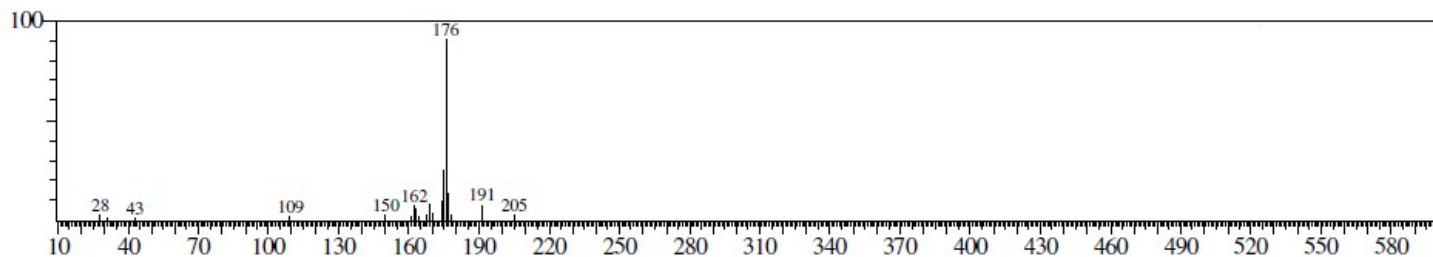

**3-p-tolylpropionic acid:**

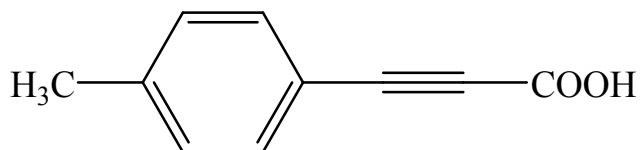

$^1\text{H}$  NMR (400 MHz,  $\text{CDCl}_3$ ):  $\delta$  = 7.46 (d,  $J$  = 27.8 Hz, 2H, Ar-H), 7.32 (d,  $J$  = 5.8 Hz, 2H, Ar-H), 2.34 (s, 3H,  $\text{CH}_3$ );  $^{13}\text{C}$  NMR (400 MHz,  $\text{CDCl}_3$ ):  $\delta$  = 153.54 (-COOH), 140.18, 131.45, 128.42, 115.56, 84.37, 81.15, 40.23, 40.07, 39.77, 39.33, 39.25, 38.87, 38.60, 21.41; GCMS  $m/z$ (% rel. inten.) 160 ( $\text{M}^+$ , 100).

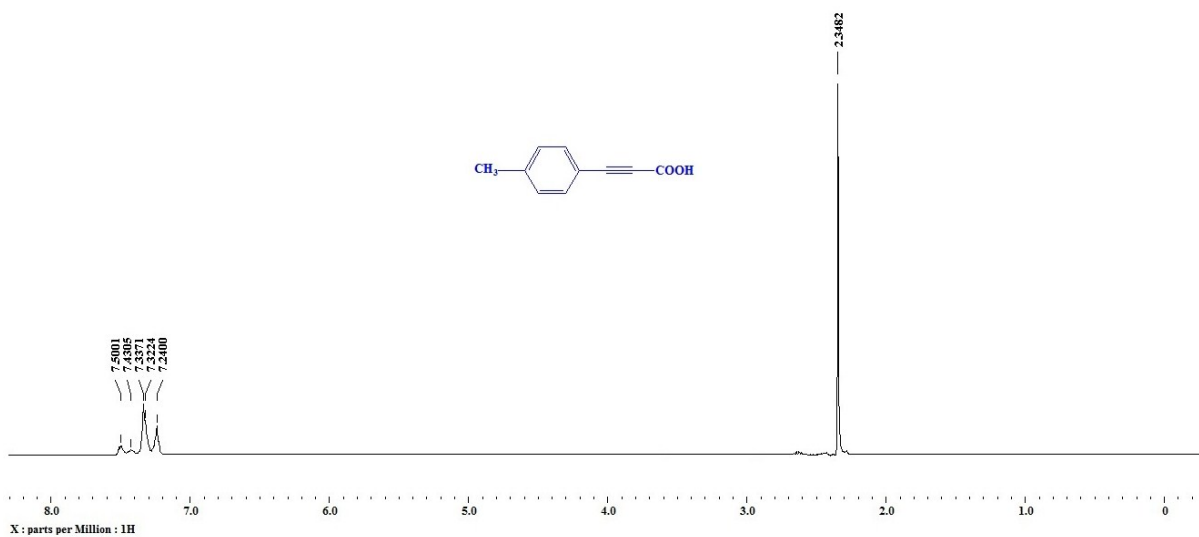

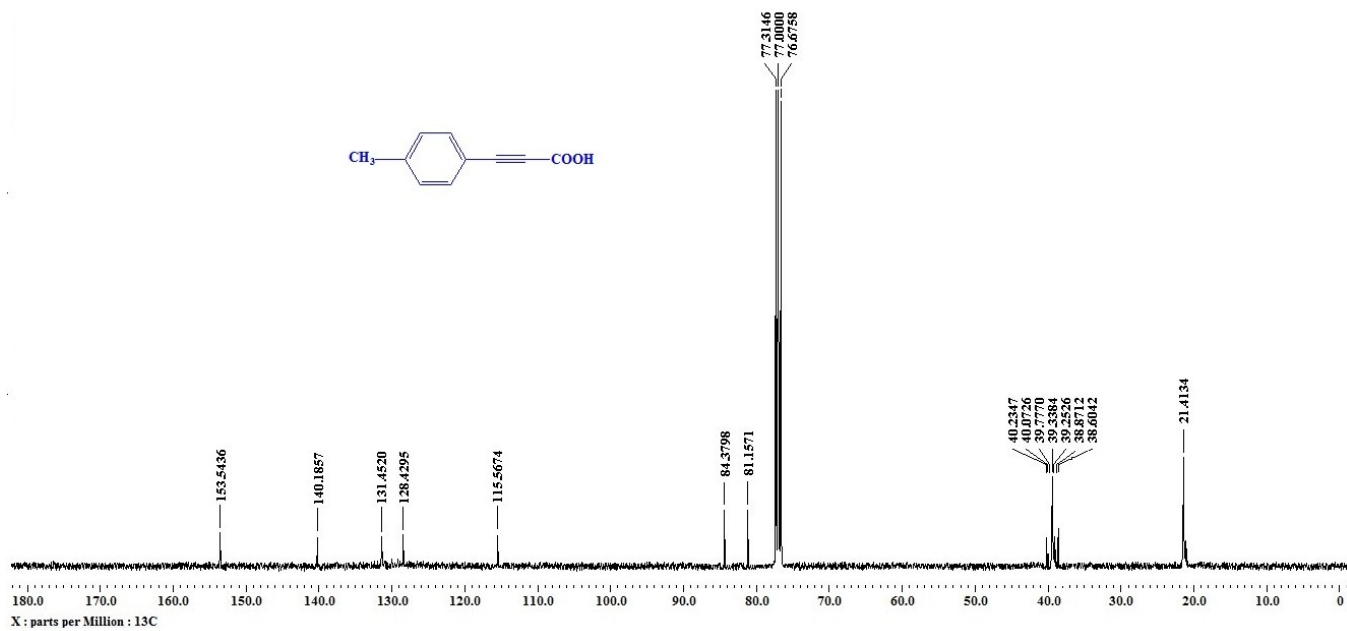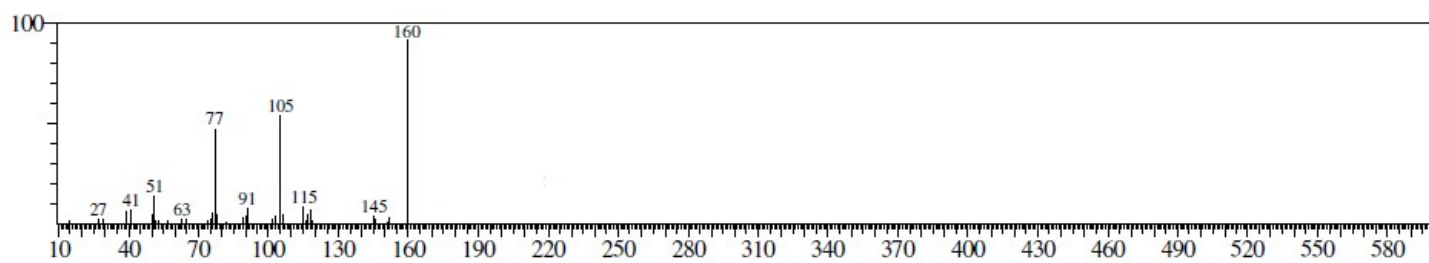

**4-nitrophenylpropionic acid:**

$^1\text{H}$  NMR (400 MHz,  $\text{CDCl}_3$ ):  $\delta = 8.28$  (d,  $J = 6.8$  Hz, 2H, Ar-H), 7.95 (d,  $J = 8.7$  Hz, 2H, Ar-H);  $^{13}\text{C}$  NMR (400MHz,  $\text{CDCl}_3$ ):  $\delta = 153.84$  (-COOH), 148.30, 148.18, 133.73, 125.63, 124.04, 85.08, 81.70, 40.12, 39.91, 39.70, 39.50, 39.29, 39.08, 38.87; GCMS  $m/z$ (% rel. inten.) 167 ( $\text{M}^+$ , 100).

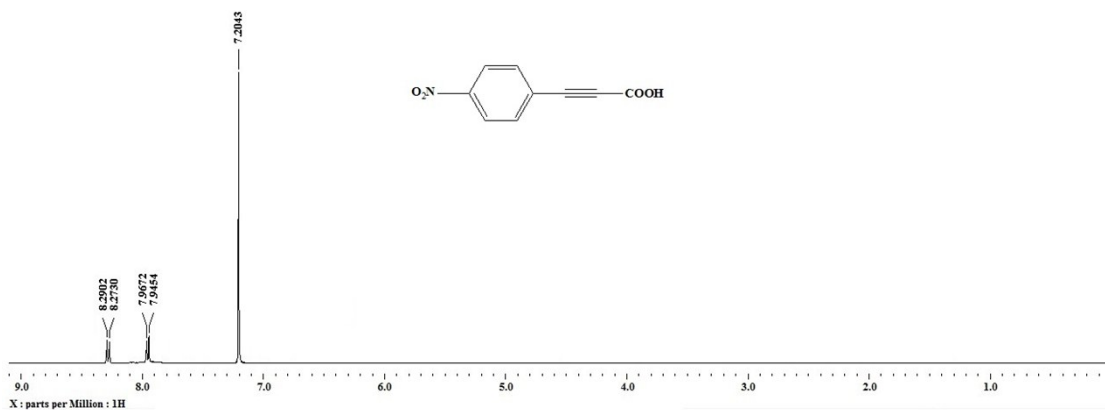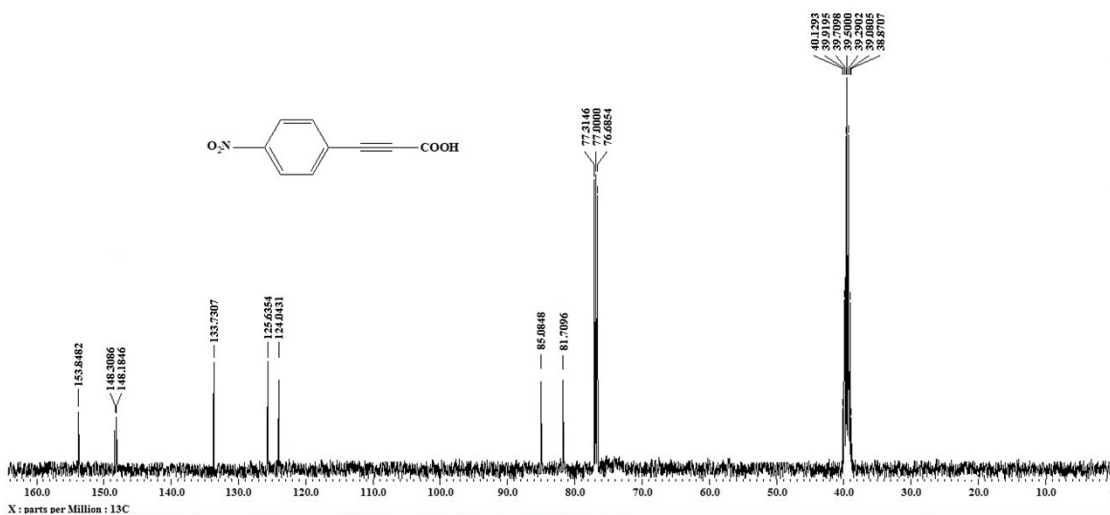

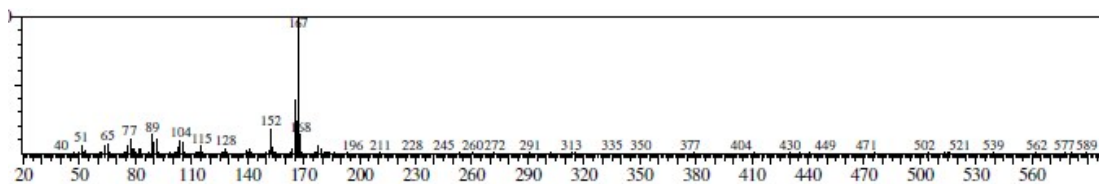

**3-Cyclohexylpropionic acid:**  $^1\text{H}$  NMR (400 MHz,  $\text{CDCl}_3$ ):  $\delta$  = 13.38 (br, s, 1H), 2.89-2.55 (m, 1H), 2.26-2.39 (m, 2H), 1.90-2.15 (m, 2H), 1.61-1.18 (m, 6H);  $^{13}\text{C}$  NMR (400 MHz,  $\text{CDCl}_3$ ):  $\delta$  = 154.83, 91.72, 74.62, 31.91, 28.22, 25.50, 24.56; GCMS  $m/z$ (% rel. inten.) 152 ( $\text{M}^+$ , 100).

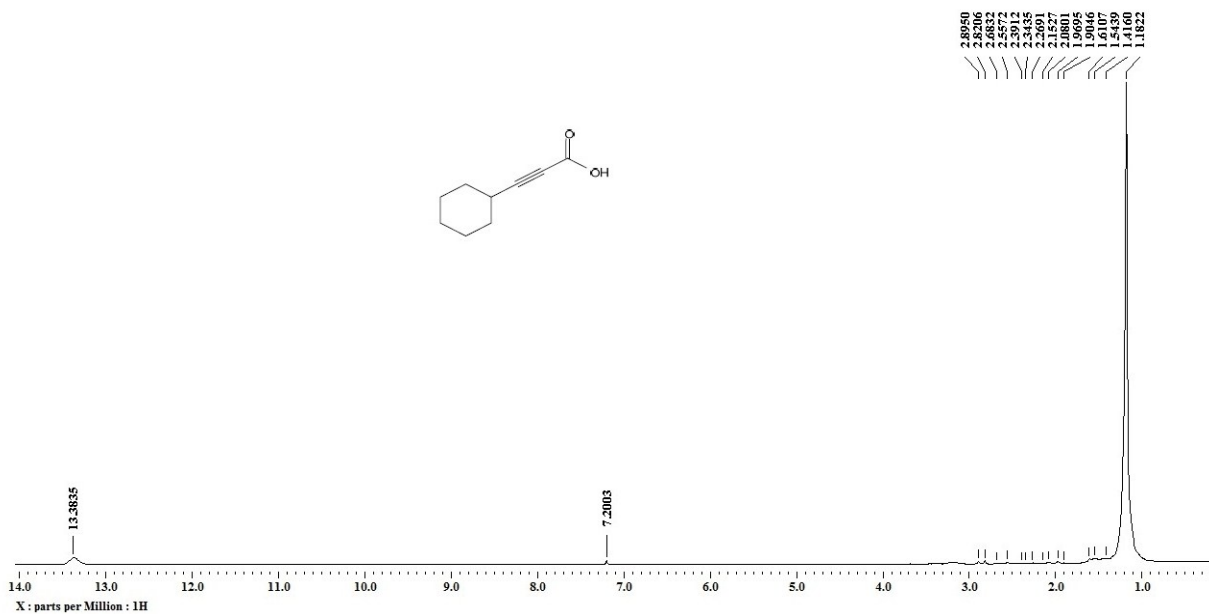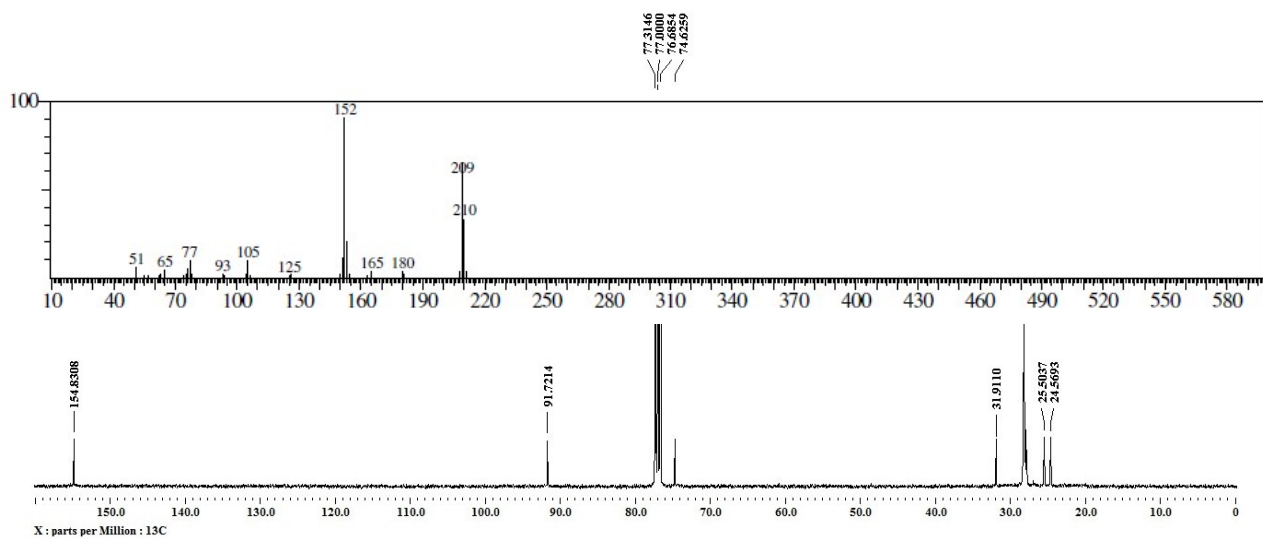

**3-(trimethylsilyl)propionic acid:** <sup>1</sup>H NMR (400 MHz, CDCl<sub>3</sub>): δ = 10.75(br, s, 1H), 0.21(s, 9H, CH<sub>3</sub>Si); <sup>13</sup>C NMR (400 MHz, CDCl<sub>3</sub>): δ= 154.48, 98.81, 53.58, 31.90, 29.67, 29.34, 22.67, 3.52; GCMS *m/z*(% rel. inten.) 142 (M<sup>+</sup>, 100).

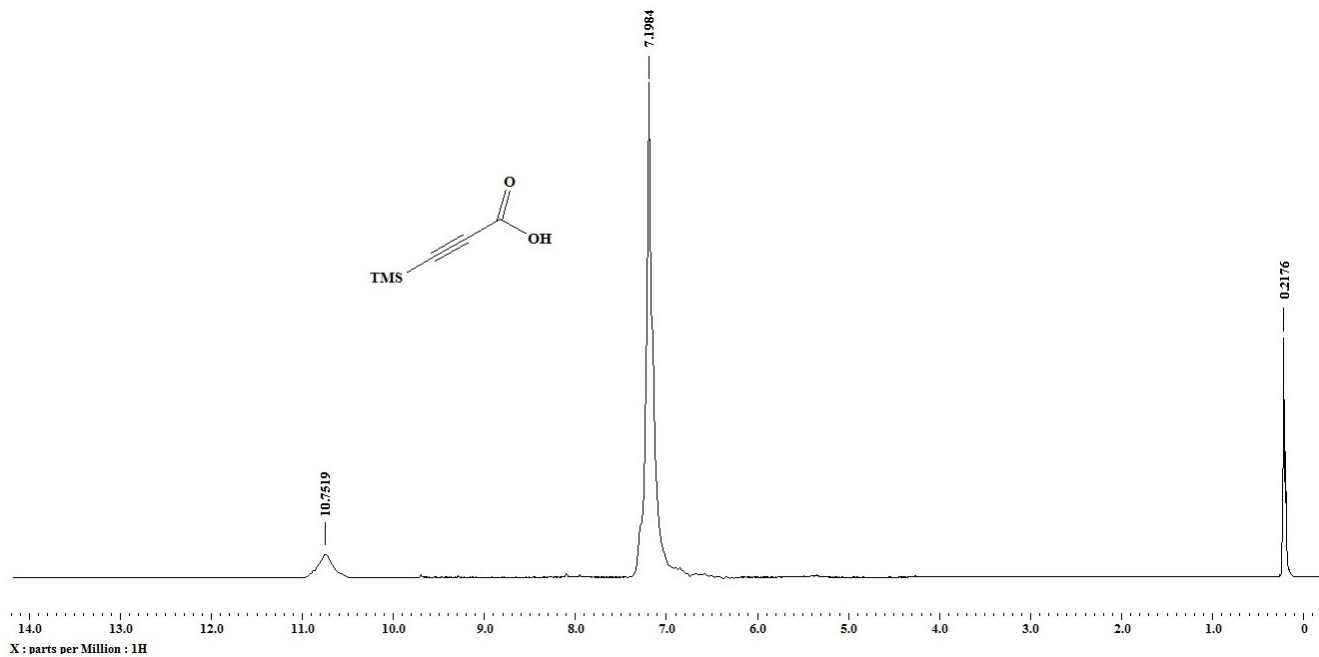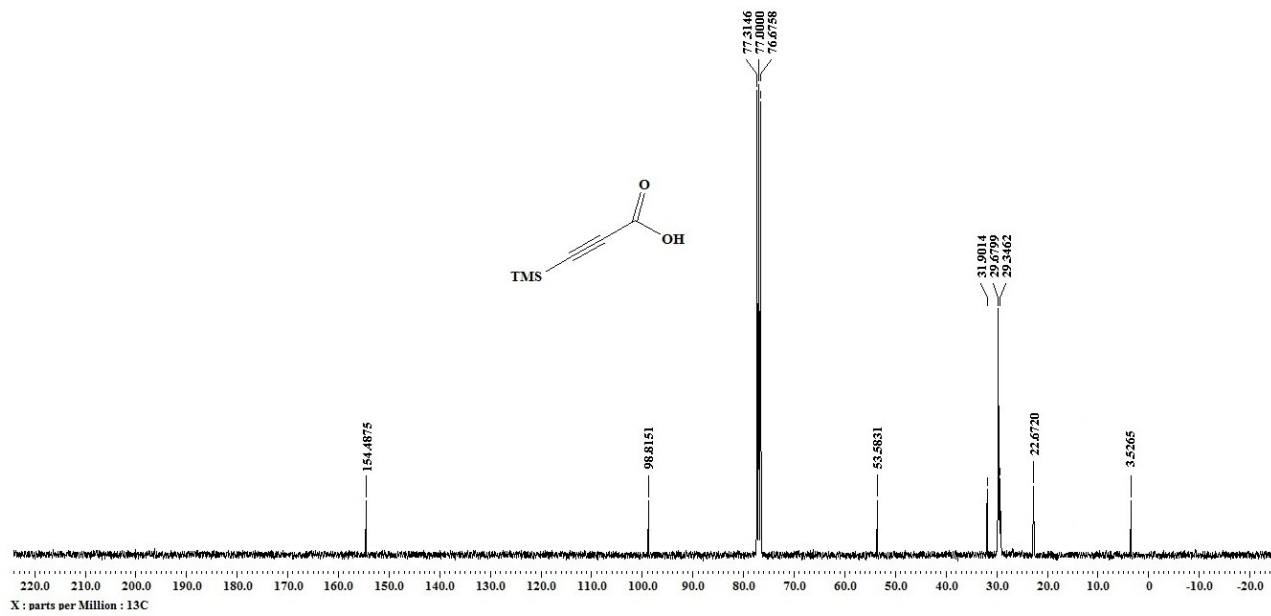

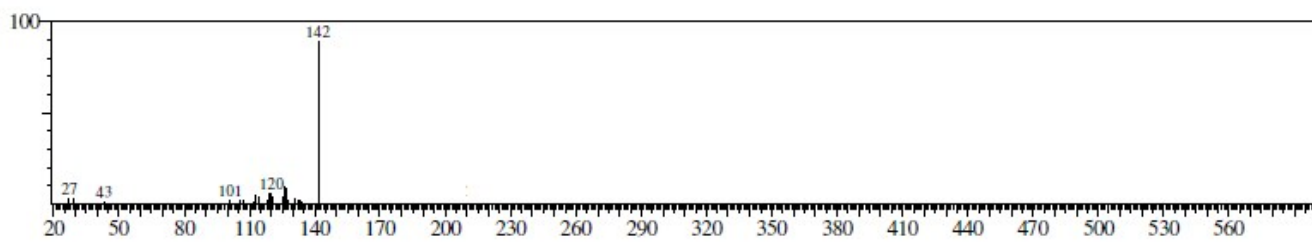

Supplement: c5dt03794h1.pdf [file c5dt03794h1.pdf]
